# Supplementary material for: Effects of Mortality Salience on Physiological Arousal
Source: Front Psychol. 2019 Aug 20;10:1893. doi: 10.3389/fpsyg.2019.01893 (PMC6710453; doi:10.3389/fpsyg.2019.01893)
Supplement: Supplementary file 1 [file Table_1.XLS]

## Sheet: stab1
Supplemental Table 1.
T-values, p-values, and q-values related to the comparison of each segment with baseline (upper half) and the mortality salience > dental pain salience comparisons (lower half)
							Segment
			Q1	R1	Q2	R2a	R2b	R2c	R2d	R2e	R2f
Segments > Baseline
	t values
		HR (bpm)	12.9	-5.58	9.12	-3.84	-1.1	1.56	1.15	2.37	3.36
		MAP (mmHg)	-	0.48	-	-	-	-	-	-	0.93
		ln HF-HRV (ms²)	-6.87	1.26	-6.45	1.66	-2.78	-2.44	-3.1	-2.57	-3.28
		ln HF-HRV (ms²)	-1.54	2.24	-2.05	2.84	-0.66	-0.3	-0.88	-0.47	0.95
		RR (cycles/min)	4.76	1.34	5.83	0.31	1.64	3.25	2.63	1.66	0.02
		NSFR (n/min)	7.12	0.67	4.56	0.48	-1.38	-1.12	-0.79	-0.27	-1.34
		PEP (ms)	-1.36	-0.3	-1.39	-0.4	0.82	0	0.66	0.63	0.01
		CO (l/min)	0.77	0.74	1.21	0.07	-0.41	-0.2	-0.23	-0.16	0.24
		TPR (mmHg·min/l)	-1.45	2.09	-0.19	1.12	1.04	0.57	0.4	0.29	-0.64
	p values
		HR (bpm)	<.001*	<.001*	<.001*	<.001*	0.283	0.129	0.255	.021*	.002*
		MAP (mmHg)	-	0.634	-	-	-	-	-	-	0.356
		ln HF-HRV (ms²)	<.001*	0.211	<.001*	0.103	.008*	.017*	.003*	.012*	.002*
		ln HF-HRV (ms²)	0.13	.027*	.046*	.005*	0.509	0.762	0.381	0.641	0.345
		RR (cycles/min)	.002*	0.214	<.001*	0.762	0.123	.003*	.012*	0.111	0.984
		NSFR (n/min)	<.001*	0.51	.004*	0.643	0.198	0.289	0.452	0.796	0.205
		PEP (ms)	0.199	0.769	0.195	0.691	0.419	0.996	0.52	0.544	0.992
		CO (l/min)	0.454	0.465	0.249	0.947	0.689	0.844	0.825	0.873	0.811
		TPR (mmHg·min/l)	0.15	.040*	0.852	0.266	0.3	0.571	0.687	0.771	0.526
	q values
		HR (bpm)	<.001*	<.001*	<.001*	.004*	0.727	0.547	0.706	0.165	.020*
		MAP (mmHg)	-	0.856	-	-	-	-	-	-	0.77
		ln HF-HRV (ms²)	<.001*	0.665	<.001*	0.492	0.066	0.135	.029*	0.103	.022*
		ln HF-HRV (ms²)	0.551	0.203	0.301	.049*	0.827	0.877	0.782	0.858	0.764
		RR (cycles/min)	.024*	0.668	.003*	0.877	0.537	.031*	0.1	0.51	0.902
		NSFR (n/min)	<.001*	0.827	.037*	0.858	0.65	0.731	0.809	0.882	0.659
		PEP (ms)	0.652	0.878	0.647	0.867	0.798	0.904	0.83	0.836	0.903
		CO (l/min)	0.81	0.814	0.7	0.899	0.866	0.888	0.886	0.891	0.884
		TPR (mmHg·min/l)	0.585	0.273	0.889	0.714	0.738	0.843	0.866	0.879	0.832
Mortality salience minus Dental pain salience
	t values
		HR (bpm)	-0.12	0.03	-0.42	-0.33	-0.44	-0.86	-0.74	-0.93	-0.76
		MAP (mmHg)	-	1.4	-	-	-	-	-	-	2.03
		ln HF-HRV (ms²)	0.95	-0.54	0.18	0.33	-0.12	1.11	0.16	0.54	1.33
		ln HF-HRV (ms²)	-1	-0.85	-1.3	-1.22	-0.59	-0.1	0.36	0.5	1.65
		RR (cycles/min)	-0.88	0.85	-0.43	0.05	0.11	0.11	0.43	-0.11	0.38
		NSFR (n/min)	-0.07	-0.53	-0.51	-0.3	0.09	-0.63	-0.34	-0.5	-0.99
		PEP (ms)	-0.47	0.16	-0.35	-0.4	-0.01	-0.55	-1.04	-0.8	-0.14
		CO (l/min)	1.05	0.92	0.99	1.19	0.57	1.3	1.15	0.92	1.14
		TPR (mmHg·min/l)	0.16	0.13	0.58	0.29	2	0.04	-0.49	0.12	1.2
	p values
		HR (bpm)	0.903	0.98	0.678	0.742	0.66	0.393	0.462	0.358	0.449
		MAP (mmHg)	-	0.164	-	-	-	-	-	-	.045*
		ln HF-HRV (ms²)	0.346	0.591	0.858	0.743	0.903	0.273	0.875	0.592	0.19
		ln HF-HRV (ms²)	0.322	0.396	0.199	0.227	0.559	0.917	0.72	0.618	0.101
		RR (cycles/min)	0.384	0.41	0.666	0.963	0.92	0.915	0.677	0.913	0.706
		NSFR (n/min)	0.945	0.606	0.611	0.772	0.926	0.542	0.741	0.631	0.354
		PEP (ms)	0.645	0.878	0.731	0.697	0.99	0.596	0.311	0.441	0.887
		CO (l/min)	0.309	0.364	0.327	0.259	0.582	0.218	0.261	0.37	0.26
		TPR (mmHg·min/l)	0.874	0.899	0.567	0.775	.049*	0.972	0.625	0.908	0.232
	q values
		HR (bpm)	0.895	0.902	0.864	0.875	0.861	0.787	0.813	0.771	0.809
		MAP (mmHg)	-	0.606	-	-	-	-	-	-	0.297
		ln HF-HRV (ms²)	0.765	0.848	0.89	0.875	0.895	0.72	0.892	0.848	0.641
		ln HF-HRV (ms²)	0.752	0.788	0.651	0.681	0.84	0.896	0.871	0.853	0.488
		RR (cycles/min)	0.783	0.794	0.862	0.901	0.896	0.896	0.864	0.896	0.869
		NSFR (n/min)	0.899	0.851	0.852	0.879	0.897	0.836	0.874	0.856	0.769
		PEP (ms)	0.859	0.892	0.873	0.868	0.903	0.848	0.745	0.806	0.893
		CO (l/min)	0.744	0.774	0.755	0.709	0.845	0.672	0.71	0.777	0.709
		TPR (mmHg·min/l)	0.892	0.894	0.842	0.879	0.313	0.901	0.855	0.895	0.686
Notes: HR = heart rate, MAP = mean arterial pressure, HF-HRV = high-frequency heart rate variability, LF-HRV = low-frequency heart rate variability, RR = respiration rate, NSFR = non-specific fluctuation rate, PEP = pre-ejection period, CO = cardiac output, TPR = total peripheral resistance, * = p or q < .05.
